# Supplementary material for: Detection of the Core Bacteria in Colostrum and Their Association with the Rectal Microbiota and with Milk Composition in Two Dairy Cow Farms
Source: MDPI journal article supplement (doi:10.3390/ani11123363), 2021-11-24
Supplement: s1 [file s1]

## Article

# Detection of the Core Bacteria in Colostrum and Their Association with the Rectal Microbiota and with Milk Composition in Two Dairy Cow Farms

Bin Chen, Guangfu Tang, Weiqing Guo, Jie Lei, Junhu Yao and Xiurong Xu \*

College of Animal Science and Technology, Northwest A&F University, Xianyang 712100, China; chenbinnwafu@163.com (B.C.); tangguangfu@nwafu.edu.cn (G.T.); guoweiqing@nwafu.edu.cn (W.G.); leijie@nwafu.edu.cn (J.L.); yaojunhu2008@nwsuaf.edu.cn (J.Y.)

\* Correspondence: xuxiurong@nwafu.edu.cn

**Citation:** Chen, B.; Tang, G.; Guo, W.; Lei, J.; Yao, J.; Xu, X. Detection of the Core Bacteria in Colostrum and Their Association with the Rectal Microbiota and with Milk Composition in Two Dairy Cow Farms. *Animals* **2021**, *11*, 3363. <https://doi.org/10.3390/ani11123363>

Academic Editor(s): Julia Steinhoff-Wagner and Céline Heinemann

Received: 27 July 2021

Accepted: 09 November 2021

Published: 24 November 2021

**Publisher's Note:** MDPI stays neutral with regard to jurisdictional claims in published maps and institutional affiliations.

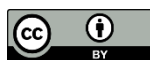

**Copyright:** © 2021 by the authors. Licensee MDPI, Basel, Switzerland. This article is an open access article distributed under the terms and conditions of the Creative Commons Attribution (CC BY) license (<http://creativecommons.org/licenses/by/4.0/>).

**Table S1.** The core families across 100 % of the collected colostrum samples of the two farms and their average relative abundance (%).

| Item                                | NX (n = 16)        | NH (n = 18)        | SEM  | p-Value |
|-------------------------------------|--------------------|--------------------|------|---------|
| <i>Flavobacteriaceae</i>            | 8.25               | 5.41               | 1.54 | 0.075   |
| <i>Porphyromonadaceae</i>           | 0.58 <sup>b</sup>  | 2.55 <sup>a</sup>  | 0.67 | 0.006   |
| <i>Carnobacteriaceae</i>            | 0.63               | 0.43               | 0.27 | 0.450   |
| <i>Bradyrhizobiaceae</i>            | 0.62               | 0.74               | 0.29 | 0.663   |
| <i>Bacteroidaceae</i>               | 0.89               | 1.02               | 0.35 | 0.701   |
| <i>Methylobacteriaceae</i>          | 0.30               | 0.58               | 0.21 | 0.207   |
| <i>Lactobacillaceae</i>             | 0.92               | 0.31               | 0.34 | 0.111   |
| <i>Staphylococcaceae</i>            | 2.87               | 4.89               | 4.45 | 0.652   |
| <i>Pseudomonadaceae</i>             | 2.25               | 1.17               | 0.43 | 0.160   |
| <i>Prevotellaceae</i>               | 0.93               | 1.04               | 0.33 | 0.742   |
| <i>Sphingobacteriaceae</i>          | 2.64               | 2.90               | 0.65 | 0.695   |
| <i>Intrasporangiaceae</i>           | 0.46               | 1.12               | 0.36 | 0.064   |
| <i>Christensenellaceae</i>          | 0.52 <sup>b</sup>  | 2.04 <sup>a</sup>  | 0.60 | 0.034   |
| <i>Enterobacteriaceae</i>           | 0.89               | 2.35               | 1.37 | 0.296   |
| <i>Corynebacteriaceae</i>           | 0.23 <sup>b</sup>  | 0.52 <sup>a</sup>  | 0.11 | 0.014   |
| <i>Moraxellaceae</i>                | 29.79 <sup>a</sup> | 9.63 <sup>b</sup>  | 6.70 | 0.005   |
| <i>Family-XIII</i>                  | 0.33               | 0.65               | 0.18 | 0.088   |
| <i>Comamonadaceae</i>               | 2.34               | 2.47               | 0.65 | 0.844   |
| <i>Rikenellaceae</i>                | 1.99               | 2.04               | 0.72 | 0.944   |
| <i>Caulobacteraceae</i>             | 0.44               | 0.60               | 0.21 | 0.463   |
| <i>Clostridiales vadinBB60group</i> | 0.31               | 0.24               | 0.10 | 0.473   |
| <i>Bacillaceae</i>                  | 7.44               | 5.45               | 3.82 | 0.606   |
| <i>Aerococcaceae</i>                | 0.32               | 0.38               | 0.15 | 0.664   |
| <i>Rhodobacteraceae</i>             | 0.55               | 0.82               | 0.18 | 0.139   |
| <i>Pasteurellaceae</i>              | 0.98               | 0.14               | 0.54 | 0.131   |
| <i>Chitinophagaceae</i>             | 0.44               | 0.46               | 0.10 | 0.856   |
| <i>Coriobacteriaceae</i>            | 0.05 <sup>b</sup>  | 0.13 <sup>a</sup>  | 0.03 | 0.009   |
| <i>Lachnospiraceae</i>              | 1.71 <sup>b</sup>  | 3.13 <sup>a</sup>  | 0.59 | 0.022   |
| <i>Xanthomonadaceae</i>             | 4.31 <sup>a</sup>  | 2.24 <sup>b</sup>  | 0.87 | 0.023   |
| <i>Micrococcaceae</i>               | 0.40               | 0.24               | 0.11 | 0.143   |
| <i>Alcaligenaceae</i>               | 0.98 <sup>a</sup>  | 0.30 <sup>b</sup>  | 0.22 | 0.007   |
| <i>Sphingomonadaceae</i>            | 0.69               | 1.01               | 0.23 | 0.175   |
| <i>Ruminococcaceae</i>              | 5.86 <sup>b</sup>  | 10.29 <sup>a</sup> | 2.16 | 0.048   |
| <i>Streptococcaceae</i>             | 0.62               | 0.36               | 0.18 | 0.167   |

Note: <sup>ab</sup> Mean values in the same row with different superscripts differ ( $p < 0.05$ ). NX, NH = colostrum samples from X dairy farm and H dairy farm.

**Table S2.** Part of the commensal probiotics and opportunistic pathogens presented in colostrum and their appearance frequency in the collected samples.

| Part of the Probiotics      | Frequency (%) | Part of the Opportunistic Pathogens | Frequency (%) |
|-----------------------------|---------------|-------------------------------------|---------------|
| <i>Bacillus circulans</i>   | 75            | <i>Acinetobacter lwoffii</i>        | 100           |
| <i>Lactobacillus</i>        | 75            | <i>Streptococcus pneumoniae</i>     | 94            |
| <i>Plantarum</i>            | 55            | <i>Delftia tsuruhatensis</i>        | 91            |
| <i>Bacillus subtilis</i>    | 24            | <i>Stenotrophomonas maltophilia</i> | 71            |
| <i>Bacteroides fragilis</i> | 18            | <i>Escherichia coli</i>             | 68            |
| <i>Lactobacillus casei</i>  | 10            | <i>Pseudomonas aeruginosa</i>       | 50            |
| <i>Ruminococcus albus</i>   | 10            | <i>Pasteurella pneumotropica</i>    | 12            |

Note: The sample number for this analysis is 34.

**Table S3.** The composition (%) and SCC number (million) in the collected colostrum.

| Item     | NX ( <i>n</i> = 16) | NH ( <i>n</i> = 18) | SEM   | <i>p</i> -Value |
|----------|---------------------|---------------------|-------|-----------------|
| Fat      | 3.17                | 3.63                | 0.58  | 0.425           |
| Protein  | 13.35               | 13.90               | 0.69  | 0.414           |
| Lactose  | 2.54 <sup>a</sup>   | 1.91 <sup>b</sup>   | 0.24  | 0.018           |
| Total    | 19.62               | 19.19               | 0.90  | 0.879           |
| Nitrogen | 68.89 <sup>b</sup>  | 192.46 <sup>a</sup> | 41.02 | 0.007           |
| SCC      | 0.33                | 0.57                | 0.13  | 0.078           |

Note: <sup>ab</sup> Mean values in the same row with different superscripts differ ( $p < 0.05$ ). NX, NH = colostrum samples from X dairy farm and H dairy farm.

**Table S4.** The correlation of the relative abundance of several pathogenic and beneficial bacteria with the number of SCC in colostrum.

| Item                            | R      | <i>p</i> -Value |
|---------------------------------|--------|-----------------|
| <i>Escherichia coli</i>         | −0.104 | 0.559           |
| <i>Pseudomonas poae</i>         | 0.142  | 0.423           |
| <i>Pseudomonas putida</i>       | 0.069  | 0.699           |
| <i>Pseudomonas aeruginosa</i>   | 0.138  | 0.435           |
| <i>Streptococcus pneumoniae</i> | 0.139  | 0.432           |
| <i>Delftia tsuruhatensis</i>    | −0.104 | 0.558           |
| <i>Acinetobacter lwoffii</i>    | 0.185  | 0.296           |
| <i>Lactobacillus plantarum</i>  | 0.255  | 0.145           |
| <i>Bacillus circulans</i>       | −0.223 | 0.204           |

Note: The sample number for this analysis is 34.

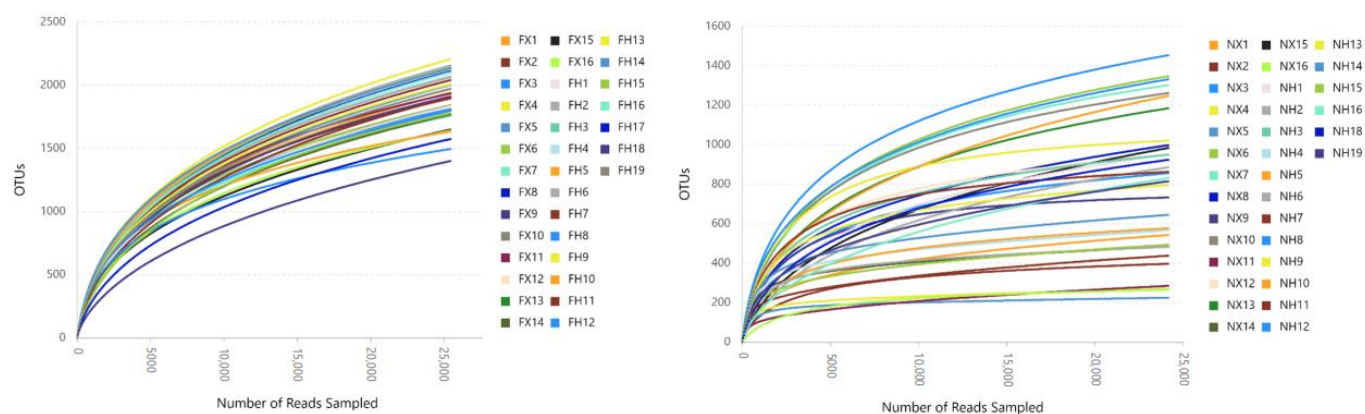

**Figure S1.** Rarefaction curve of all samples NX ( $n = 16$ ), NH ( $n = 18$ ) = colostrum samples from X dairy farm and H dairy farm, FX ( $n = 16$ ), FH ( $n = 19$ ) = fecal samples from X Dairy farm and H dairy farm.

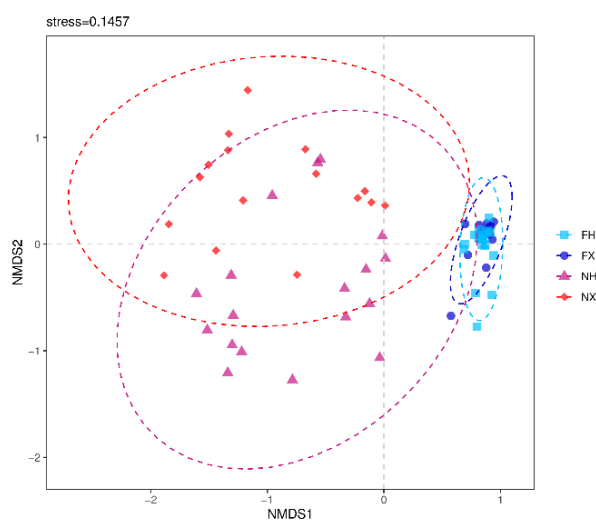

**Figure S2.** Non-metric multidimensional scaling of the bacterial structure of Colostrum and rectal feces samples in the two farms NX ( $n = 16$ ), NH ( $n = 18$ ) = colostrum samples X and Y Dairy farms; FX ( $n = 16$ ), FH ( $n = 19$ ) = fecal samples from X dairy farm and H dairy farm. NMDS1 characterised the dataset primarily according to the farms, whereas NMDS2 characterised the dataset primarily according to sample source (milk or feces).

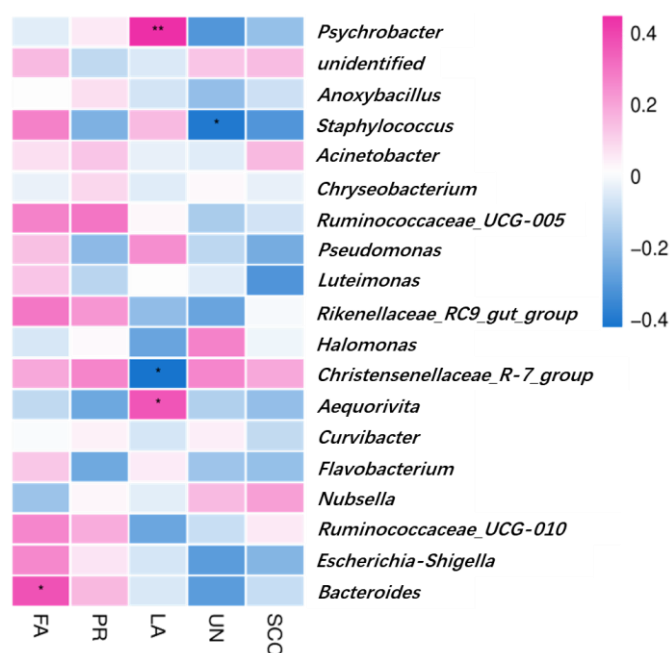

**Figure S3.** Correlations between colostrum composition and the 20 top genera. Note: FA = fat, PR = protein, LA = lactose, UN = urea nitrogen, SCC = somatic cell count. The sample number for this analysis is 34. \* and \*\* meant the correlation is obvious ( $p < 0.05$ ) and very significant ( $p < 0.01$ ), respectively.
